# Supplementary material
Source: Research Square preprint supplement (doi:10.21203/rs.3.rs-9564623/v1)
Supplement: Supplementary file 2 [file c63c44c84a4511a32d79c9cd.docx]

**Table 1: Antibiotic use estimates in sheep in southern Karnataka districts (n=60 farms)**

| **Locations in Karnataka** | **Chitradurga and Tumakuru Districts** |
| --- | --- |
| **Total number of sheep farms/villages/ migratory flocks** | 60 |
| **Total number of animals at risk of exposure to antibiotic use** | 9124 |
| **Number and proportion of animals treated with different class of antibiotics** | 859 (9.41%) |
| **The average body weight of sheep** | 27.48 ±1.02 kg |
| **The average number of treatment days** | 4.8 ± 0.05 days |
| **Total quantity of antibiotics used (all the classes together)** | 1013.52 ±1.29 g |
| **Average quantity of antibiotics used in sheep in the districts** | 4.46±0.52 mg/kg of population correction unit (PCU) |
| **Common classes of antibiotics used in sheep farms** | Enrofloxacin, Oxytetracycline, Ciprofloxacin, Gentamicin, Ceftizoxime, Gentamicin, Levofloxacin and Amoxicillin-clavulanate |

**Table 2: Table showing the positivity rate for *E coli* and ESBL producing *E coli* in sheep and environmental samples**

| **Details** | **Sheep** | **Environment** | | | | **Total**  **(Sheep + Environment)** |
| --- | --- | --- | --- | --- | --- | --- |
| **Soil** | **Water** | **Feed** | **Soil+ Water+ Feed** |
| Total number of samples collected | **565** | 69 | 25 | 42 | **136** | **701** |
| Total number of *E. coli* positive samples | **342** | 42 | 11 | 23 | **76** | **418** |
| % *E. coli* positive samples | **60.5%** | 60.87% | 44% | 54.76% | **55.88%** | **59.63%** |
| Total number of ESBL *E. coli* isolates | **79** | 16 | 1 | 2 | **19** | **98** |
| % ESBL positivity in *E. coli* isolates | **23.09%** | 38.09% | 9.09% | 8.69% | **25%** | **23.44%** |
| % occurrence of ESBL positive *E. coli* isolates in total samples | **13.98%** | 23.19% | 4% | 4.76% | **13.97%** | **13.98%** |
